# SpatialSort: A Bayesian Model for Clustering and Cell Population Annotation of Spatial Proteomics Data

Eric Lee<sup>1,2</sup>

Kevin Chern<sup>3</sup>

Michael Nissen<sup>4</sup>

Xuehai Wang<sup>4</sup>

IMAXT Consortium<sup>5</sup>

Chris Huang<sup>6</sup>

Anita K. Gandhi<sup>6</sup>

Alexandre Bouchard-Côté<sup>3</sup>

Andrew P. Weng<sup>4,7</sup>

Andrew Roth<sup>1,7,8</sup>

1. Department of Molecular Oncology, BC Cancer Agency, Vancouver, BC, Canada

2. Graduate Bioinformatics Training Program, University of British Columbia, Vancouver, BC, Canada

3. Department of Statistics, University of British Columbia, Vancouver, British Columbia, Canada

4. Terry Fox Laboratory, British Columbia Cancer Research Centre, Vancouver, British Columbia, Canada

- 11 5. CRUK IMAXT Grand Challenge Consortium, Cambridge, UK
- 12 6. Translational Medicine Hematology, Bristol Myers Squibb, Summit NJ, USA
- 13 7. Department of Pathology and Laboratory Medicine, University of British Columbia,  
14 Vancouver, BC, Canada
- 15 8. Department of Computer Science, University of British Columbia, Vancouver, British  
16 Columbia, Canada

17 Correspondence should be addressed to AR (aroth@bccrc.ca)

18 Email addresses of authors: EL (erlee@bccrc.ca), KC (kchern@bccrc.ca), MN (mnissen@bccrc.ca),  
19 XW (xwang@bccrc.ca), IMAXT (greg.hannon@cruk.cam.ac.uk), CH (Chris.Huang@bms.com), AG  
20 (Anita.Gandhi@bms.com), ABC (bouchard@stat.ubc.ca), AW (aweng@bccrc.ca)

21

## Abstract

22

Emerging spatial proteomics technologies have created new opportunities to move beyond quantifying the composition of cell types in tissue and begin probing spatial structure.

23

24

However, current methods for analysing such data are designed for non-spatial data and ignore

25

spatial information. We present SpatialSort, a spatially aware Bayesian clustering approach

26

that allows for the incorporation of prior biological knowledge. SpatialSort clusters cells by

27

accounting for affinities of cells of different types to neighbours in space. Additionally, by

28

incorporating prior information about cell types, SpatialSort outperforms current methods and

29

can perform automated annotation of clusters.

30

**Keywords:** spatial proteomics, spatial-aware clustering, cell type annotation, Bayesian

31

inference

## 32 **Background**

33 Recently developed high throughput spatial protein expression profiling technologies can perform  
34 highly multiplexed phenotyping of single cells, while preserving the spatial organization of tissues.  
35 Examples of such technologies include imaging mass cytometry (IMC)<sup>1</sup>, multiplexed ion beam  
36 imaging (MIBI)<sup>2</sup>, and co-detection by indexing imaging (CODEX)<sup>3</sup>. These technologies have  
37 the capacity to quantify dozens of protein markers at single cell resolution in-situ. This provides  
38 an opportunity to enhance studies of cellular heterogeneity, by going beyond the quantification  
39 of cellular composition and allowing for direct inference of cell to cell interactions from spatial  
40 context.

41 A key step when analysing spatial data is to assign cells to their constituent cellular populations  
42 as defined by expression profiles e.g. T-cells, B-cells, malignant cells etc. To date, the dominant  
43 paradigm for performing this analysis is to cluster cells based on their expression profile and then  
44 perform post-hoc annotation of the clusters based on known markers that delineate cell types<sup>4-9</sup>. As  
45 we demonstrate, such a procedure is sub-optimal and new approaches tailored to spatial expression  
46 data are required.

47 The clustering step of most two-step analysis have been performed using methods developed  
48 for disaggregated single cell data<sup>4-9</sup>, such as PhenoGraph<sup>10</sup>. A limitation of disaggregate  
49 methods is that they ignore spatial information, in particular the identity of neighbouring cells.  
50 Neighbourhood information can be highly informative when inferring the cell types, for example  
51 if cell types tend to associate due to receptor-ligand signalling. While some recent approaches  
52 have begun to address this issue for spatial transcriptomic data<sup>11,12</sup> using Hidden Markov Random  
53 Field (HMRF) models<sup>13,14</sup>, they have thus far only been able to account for an increased affinity  
54 of cells of the same type to be neighbours. This autonomous cell type interaction assumption  
55 amounts to “smoothing” the assignment of cells in close proximity to originate from the same  
56 population. While this is likely a reasonable assumption in many cases, it fails to capture more  
57 complex biological scenarios involving non-autonomous signalling between cells of different

58 types. Our first contribution in this work is to develop a generalised HMRF model capable of  
59 handling non-autonomous neighbour interactions.

60 The annotation of clusters to identify their cell type in two-step procedures is typically performed  
61 manually. Manual annotation is problematic as it can be subjective and difficult to reproduce<sup>15</sup>.  
62 Furthermore, separating the annotation step from clustering means that valuable “prior”  
63 information about the expression profiles expected for each cluster are ignored, forcing methods to  
64 learn de novo the expression profiles of clusters. While a significant number of methods have been  
65 developed to address the cell type annotation problem for disaggregated single cell data<sup>16</sup>, we are  
66 not aware of any approaches that incorporate spatial information. Thus, our second contribution in  
67 this work is to provide several options for performing joint spatially aware clustering and cell type  
68 annotation. As we show in the results, this approach improves clustering accuracy while negating  
69 the need to perform laborious and subjective manual cluster annotation.

70 To address these issues outlined above we have developed a Bayesian model, SpatialSort, to jointly  
71 perform spatially aware clustering and cell type annotation. The input into SpatialSort is a cell by  
72 marker expression profile matrix, and a graph where edges represent adjacency between pairs  
73 of cells in space. To capture spatial dependencies between cells, SpatialSort models cell labels  
74 using an HMRF. We account for different propensities of cell types to be neighbours via an  
75 interaction matrix with entries indicating the affinity of cell types to neighbour each other. We  
76 fit the model using Markov Chain Monte Carlo (MCMC) methods. The output of SpatialSort is a  
77 clustering of cells, and (optionally) annotated identities of each cluster. To test the performance of  
78 SpatialSort we have conducted benchmarking experiments using synthetic and semi-real datasets.  
79 We illustrate the utility of SpatialSort by applying it to real world diffuse large B-cell lymphoma  
80 (DLBCL) dataset profiled with MIBI. Our results demonstrate SpatialSort is able to leverage spatial  
81 information and prior knowledge of cell type composition to improve clustering and annotation of  
82 spatial expression data.

## 83 Results

### 84 Probabilistic spatially aware clustering with SpatialSort

85 We provide a high level overview of the SpatialSort model and inference procedure here, a  
86 more detailed discussion can be found in the Methods sections. A schematic overview of the  
87 SpatialSort method is provided in **Fig. 1**. SpatialSort jointly considers cell expression values  
88 and neighbourhood spatial structure to perform clustering. To perform unsupervised clustering,  
89 SpatialSort requires inputs consisting of a multi-sample marker by cell expression matrix and a  
90 list of sample-specific cell location matrices from spatial expression profiling, which is used to  
91 identify neighbour cells. Neighbouring cells are defined as cells having a spatial proximity less  
92 than a user set threshold in pixels. SpatialSort takes the cell location and neighbour relations to  
93 construct sample-specific cell connectivity graphs that link cells that are spatially proximal. To  
94 capture the non-random spatial associations between cell types, SpatialSort uses an HMRF to  
95 allow cells to influence the cluster assignments of their neighbours (**Supplementary Fig. 1**). As  
96 exact Bayesian inference for HMRF models is intractable, SpatialSort uses MCMC sampling to  
97 approximate the posterior distribution and estimate model parameters.

98 SpatialSort can be run in a completely unsupervised way when no prior information is available  
99 about cell populations. However, the majority of spatial proteomic studies utilize markers chosen  
100 to discriminate among known cell populations. SpatialSort provides two modes for incorporating  
101 information about these known populations expression profiles. *Prior* mode takes as an additional  
102 input a population by marker matrix, which encodes prior knowledge of the degree of expression  
103 per marker in each cell population. *Anchor* mode involves the introduction of anchors cells, which  
104 are expression profiles of cells measured by previous assays and assigned to cell populations.  
105 Multiple cells from each population may be included in the set of anchors, which can better reflect  
106 the variability of expression within the population and aid SpatialSort in inferring the expected  
107 variance of marker expressions. We do not model spatial effects for anchor cells, and thus anchor  
108 cells can be measured using either disaggregated or spatial technologies. The major constraint for

109 anchors are: **i)** that a reasonable number of overlapping markers are covered in the anchor and  
110 the query dataset, **ii)** the anchor dataset is suitably transformed to have expression which match  
111 the query dataset. We illustrate the use of anchors derived from disaggregate CyTOF to analyze  
112 a MIBI dataset later. Both prior and anchor mode can accommodate the discovery of unknown  
113 populations, for prior mode this amounts to specifying clusters with vague priors for all markers  
114 and for anchor mode specifying clusters with no anchor cells.

### 115 **Modelling non-autonomous cell interactions increases accuracy**

116 We first sought to systematically explore the impact of incorporating spatial information during  
117 clustering. To do so we simulated data from the SpatialSort model allowing for non-autonomous  
118 cell to cell affinities. To simulate real spatial structure, breadth first search was applied on  
119 neighbourhood graphs generated from a previous IMC study<sup>8</sup> as it maintains the spatial structure  
120 of the subset graph. We explored variations of expression values and spatial structure by generating  
121 100 datasets each for two types of HMRF interactions parameters which we refer to as ‘biased’  
122 and ‘uniform’. Biased refers to the condition where cells of the same cluster had a stronger  
123 affinity to be grouped together spatially, whereas uniform referred to the case where affinities  
124 were sampled from a uniform distribution. We used these datasets to evaluate three variants of  
125 the SpatialSort model differing in the number of parameters used to model cell to cell affinities:  
126 ‘0p’ - a single fixed parameter for autonomous affinities; ‘1p’ - same as 0p but with the parameter  
127 estimated; ‘Kp’ - one parameters per cluster to reflect autonomous and non-autonomous cell to  
128 cell affinities (Methods). We also compared against a Gaussian mixture model (GMM), which is  
129 effectively a non-spatial equivalent to SpatialSort.

130 The results of this analysis are summarised in **Supplementary Figs. 2** and **3** for the biased and  
131 uniform datasets respectively. Clustering accuracy was assessed using the V-Measure metric with a  
132 value of 1.0 indicating perfect accuracy<sup>17</sup> (Supplementary Table 1). When comparing methods we  
133 applied the Friedman test to see if there were any significant differences in performance between  
134 the methods (p-value<0.01) (Supplementary Table 4). If the Friedman test was significant we

135 then applied the post-hoc Nemenyi test with a Bonferroni correction to all pairs of methods to  
136 determine which methods showed significantly different performance from each other ( $p$ -value  $<$   
137  $0.01$ )<sup>18</sup>(Supplementary Table 7). All statements of significance are with respect to this procedure.  
138 All variants of the SpatialSort model significantly outperformed the GMM in our experiments.  
139 The simplest SpatialSort model, the  $0p$  model, had a V-measure which was  $0.138$  higher than the  
140 GMM on average for both the biased and unbiased datasets. The  $Kp$  model had significantly  
141 better accuracy than both the  $0p$  and  $1p$  models for both biased and uniform datasets. For the  
142 biased dataset, the V-measure was on average  $0.027$  and  $0.057$  higher for the  $Kp$  model when  
143 compared to the  $0p$  and  $1p$  models respectively. The performance delta between  $Kp$  and simpler  
144 spatial models was much larger for the uniform datasets. The  $Kp$  model had an average increase  
145 of V-measure of  $0.112$  and  $0.093$  over the  $0p$  and  $1p$  models respectively.  
146 The increased accuracy of all variants of the SpatialSort model in comparison to the GMM  
147 highlights the importance of accounting for spatial structure. The increased delta in performance  
148 between the  $Kp$  and simpler spatial models supports the notion that explicitly accounting for  
149 non-autonomous cell to cell interactions can lead to significant gains in performance when such  
150 interactions are present.

## 151 **SpatialSort is robust to overlapping expression profiles**

152 We posited that accounting for spatial structure would improve cluster assignment in the case  
153 of cells with similar expression profiles. To explore this hypothesis simulated data using the same  
154 strategy as the previous synthetic experiment, but varied the degree of overlap in marker expression  
155 distributions. Marker expressions were modelled using Gaussian mixtures that were generated  
156 using the MixSim R package<sup>19</sup>, which allowed for controllable overlap of simulate expression  
157 profiles. We evaluated across 5 different overlaps from  $0.025$  to  $0.125$  and varied spatial structure  
158 by generating 50 datasets for each overlap under both biased and uniform interaction parameters.  
159 For this analysis we consider only the  $Kp$  variant of the SpatialSort model, henceforth referred to  
160 as SpatialSort. We compared against GMM as a baseline, and also Phenograph<sup>10</sup> which is a widely



161 used clustering approach for spatial data. We again applied the Friedman and post-hoc Nemenyi  
162 test to assess statistical significance.

163 Results from this experiment are summarized in **Supplementary Figs. 4 and 5**. SpatialSort  
164 significantly outperformed the GMM and Phenograph for all overlap values on both the biased  
165 and uniform datasets. The average increase of V-measure for SpatialSort versus GMM ranged  
166 from 0.210 to 0.399 and versus Phenograph ranged from 0.128 to 0.492 (Supplementary Tables 2  
167 and 8). The performance of all methods degraded as the degree of overlap in expression profiles  
168 increased. However, SpatialSort's performance was significantly more robust to increasing overlap  
169 (Supplementary Tables 5 and 8). This trend held for both biased and uniform datasets. These  
170 results support the hypothesis that spatial information can help to more accurately cluster cell  
171 types with similar expression profiles.

## 172 **Prior information improves accuracy**

173 We next sought to explore the impact of incorporating prior information during clustering. To do  
174 so we generated *semi-real* datasets by using real cell expression profiles from a 13-dimensional  
175 CyTOF bone marrow mononuclear cell data downloaded from Levine et al<sup>10</sup>. Cell labels for  
176 this dataset were obtained by manual gating in a previous study<sup>20</sup> and used as ground truth for  
177 our analysis. Cell neighbourhood graphs and node labels were generated the same way as the  
178 synthetic experiments. Expression values were associated with nodes in the graph by assigning  
179 a cell from the corresponding cluster in the CyTOF data. We explored variations of clusters and  
180 spatial structure by generating 100 datasets for the biased and uniform interaction parameters.  
181 The compositions of cell types was similar when simulating data with either of the two types  
182 of HMRF interaction parameter settings (**Supplementary Fig. 6a-b**), with the difference in  
183 datasets manifesting in the spatial organization of cells (**Fig. 2a-b**). We compared SpatialSort  
184 in unsupervised, prior and anchor modes to GMM and Phenograph. We performed principle  
185 component analysis (PCA) to reduce the dimensionality of the data to 8 dimensions for GMM,  
186 unsupervised SpatialSort and SpatialSort with anchors. No dimensionality reduction was applied

187 when using prior mode for SpatialSort, as specifying prior values of principle components was not  
188 a realistic use case. Phenograph was also run without PCA dimensionality reduction, as it applies  
189 its own dimensionality reduction.

190 Results of this experiment are summarized in **Fig. 2c-d** and Supplementary Tables 3, 6 and 9.  
191 SpatialSort was significantly more accurate than GMM for both biased and uniform datasets using  
192 all three modes. The average increase in V-measure for SpatialSort ranged from 0.133 to 0.259.  
193 There was no significant difference in performance between SpatialSort in unsupervised mode  
194 and Phenograph for the biased dataset, and unsupervised SpatialSort significantly outperformed  
195 Phenograph in the uniform dataset. When using prior mode, there was no significant difference  
196 between SpatialSort and Phenograph for the biased dataset, and again SpatialSort significantly  
197 outperformed Phenograph for the uniform dataset. SpatialSort demonstrated its best performance  
198 in the anchor mode. Using anchors SpatialSort outperformed GMM and Phenograph on both  
199 the biased dataset and the uniform dataset. SpatialSort in unsupervised mode was significantly  
200 outperformed in all cases by both prior and anchor modes. A significant difference in performance  
201 was observed between prior and anchor modes in the biased dataset, however it was not observed  
202 in the uniform dataset with both methods reporting V-measures near 0.97. These results suggest  
203 the including prior or anchors information significantly improves the accuracy of spatially aware  
204 clustering.

## 205 **Employing anchors to characterize the spatial architecture of DLBCL**

206 To illustrate the real-world utility of SpatialSort we next analysed a MIBI dataset of 116,000 cells  
207 from a cohort of 29 patients with DLBCL. For each patient, two regions of interest (ROI) were  
208 obtained to address variations in tumour content. We also incorporated the expression data of  
209 128,673 cells from a previously clustered CyTOF assay of the same 29 patients to provide anchors  
210 for the characterization of the cellular composition of the tumour micro-environment in the MIBI  
211 data. We further subsetted the MIBI and CyTOF data by retaining only marker channels present in  
212 both modalities, which were CD45, CD19/PAX5, CD3, CD4, CD8, CD45RO, CD57, CXCR5,

213 PD-1. A linear normalization was applied to scale data from the two modalities to the same  
214 expression range, and dimensionality reduction with PCA was applied. We then ran the 0p, 1p  
215 and SpatialSort (Kp model) models with anchors to perform label transferring.

216 The results of this analysis are summarized in **Fig. 3** and **Fig. 4**. With spatial data, we were able  
217 to investigate the interaction matrices which indicate the observed frequency of two cell types  
218 to be spatially proximal. All three spatial models were able to capture the strong autonomous  
219 interaction between B cells (**Fig. 3a-b**, **Supplementary Fig. 7a**) due to the property of DLBCL  
220 having substantially higher tumour cell content than cells of other types<sup>21</sup> (**Supplementary Fig. 8**).  
221 However, we observed a significant difference (p-value=0.00, Pearson chi-squared test) in the cell  
222 type distribution estimated by the 0p model compared to the SpatialSort and 1p models (**Fig. 3c-d**,  
223 **Supplementary Fig. 7b**).

224 Visualization with cluster specific heatmaps (**Fig. 3e-f**, **Supplementary Fig. 7c**) revealed some  
225 clusters from the 0p model having higher disparity in expression patterns between cells than that  
226 of SpatialSort and 1p models. Applying the Davies-Bouldin score<sup>22</sup>, SpatialSort and the 1p model  
227 were superior at 1.92 compared to the 0p model at 2.67, with a lower score indicating higher  
228 coherence and less noise within clusters. Additionally, visualization of the cellular associations  
229 in the spatial structure using patient-specific neighbourhood graphs depicted an over-smoothing  
230 effect from the 0p model compared to the 1p and SpatialSort models (**Fig. 4a-c**). An exemplar  
231 from sample P7683 illustrates that SpatialSort can more effectively resolve cell types consistent  
232 with lineage marker intensities and effectively distinguish between cell types with overlapping  
233 expression profiles. Furthermore, these results suggests that the non-random associations between  
234 cellular phenotypes in the spatial structure can be more effectively identified when autonomous  
235 and non-autonomous interactions are inferred in spatially aware clustering.

## 236 **Discussion and conclusions**

237 SpatialSort provides two important advancements over current state of the art methods for  
238 analysing spatial protein expression data. First, SpatialSort accounts for potential affinities  
239 between non-autonomous cell neighbours while clustering. This more accurately models the  
240 underlying biology and improves over the smoothing approach implicit in current HMRF based  
241 models<sup>11,12</sup>. Second, SpatialSort provides the ability to incorporate prior information about the  
242 expected cellular populations present. This improves upon post-hoc labelling of clusters due to  
243 the fact that prior information is directly incorporated while clustering, increasing accuracy.

244 SpatialSort's main limitation is computational complexity due to the challenges of posterior  
245 inference. The posterior distribution is doubly intractable because not only is the normalization  
246 constant of the posterior distribution difficult to evaluate explicitly, as is typical for Bayesian  
247 models, but also the likelihood of the HMRF. Previous HMRF based approaches have avoided  
248 this issue by using a single autonomous affinity value set manually<sup>11,12</sup>, thus avoiding the need  
249 to compute the normalization constant of the HMRF. Our results suggest this limits current  
250 HMRF methods to effectively be spatial smoothers. We address this issue using the double  
251 Metropolis-Hastings algorithm to approximately sample from the posterior. However, this  
252 precludes the possibility of using more computationally efficient approaches such as expectation  
253 maximization and variational methods for inference. Despite this, our analysis of real datasets  
254 with over 100,000 cells took on average 1.1 minute per sampling iteration or 9 hours to perform  
255 an entire run on a personal laptop computer. For extremely large datasets we would suggest  
256 downsampling the number of cells based on a breadth first search of the neighbour graphs. Though  
257 we have not explored it in this work, there is also significant opportunity for parallelisation across  
258 disconnected components of the neighbour graph.

259 In this work we have primarily focused on the application of SpatialSort to proteomic data.  
260 However, there is no reason the model could not be modified to work with transcriptomic data.  
261 The key consideration would be that transcriptomic data is typically integer valued in contrast

262 to proteomic data which is continuous. To address this, the user could perform a suitable  
263 transformation of the count data to make it continuous as is common in the differential expression  
264 literature<sup>23</sup>. An alternative approach we leave for future work would be to replace the Normal  
265 emission distribution for the data with discrete distribution such as a Negative-Binomial<sup>24</sup>.  
266 We believe SpatialSort will be a valuable contribution to the spatial expression toolbox for many  
267 biologists. It addresses several unmet needs in the field and identifies several novel issues that have  
268 thus far been ignored.

## 269 Methods

### 270 A generative model for spatially-aware clustering of expression data

271 SpatialSort is an instance of a Hidden Markov Random Field (HMRF) model. HMRFs models are  
272 defined on an undirected graph  $G = (E, V)$  where  $E$  is the set of edges in the graph and  $V$  are the  
273 set of vertices or nodes. Because the graph is undirected we assume that  $E$  is a set of sets, where  
274 elements of  $E$  are sets of the form  $\{u, v\}$  with  $u, v \in V$ .

275 Let the observed data be denoted by  $Y = \{y_n\}_{n=1}^N$ , where  $N$  is the total number of data points and  
276  $N = |V|$ , in the case of SpatialSort a data point is the measured expression profile of a cell. We  
277 assume  $y_n \in \mathbb{R}^M$  where  $M$  denotes the number of proteins measured. Each data point  $y_n$  has an  
278 associate latent variable  $x_n \in \{1, \dots, K\}$ , where  $K$  is the number of clusters or cell populations  
279 in the case of SpatialSort. Let  $X = \{x_n\}_{n=1}^N$  denote the set of all latent cluster allocation variables  
280 where each  $x_n$  is the label of a node  $n$  in the graph  $G$ . We assume  $X$  follows a Markov Random  
281 Field (MRF) distribution where the value of  $x_n$  depends on the values of its immediate neighbours  
282 in the graph. We denote the set of neighbours of  $x_n$  in  $G$  by  $\mathcal{N}(n) = \{n' | \{n, n'\} \in E\}$ . The MRF  
283 is governed by  $K \times K$  affinity matrix which we denote by  $\beta$ . The specification of the priors for  
284 the entries of  $\beta$  is deferred to the next section where we describe variants of the SpatialSort model.  
285 Each cluster  $k$  has an associated parameter  $\theta_k$ , which in the case of SpatialSort represents the mean  
286 and precision of expression of proteins for cells associated with cluster  $k$ . Each component of  $\theta_k$ ,  
287 denoted  $\theta_{km}$ , is assumed to be independent and given a NormalGamma prior distribution. Given  $x_n$   
288 and  $\{\theta_k\}_{k=1}^K$  we assume the values of  $y_n$  are conditionally independent. The full joint distribution  
289 for the model is given in equation 1.

$$p(X, Y, \{\theta_k\}_{k=1}^K, \beta) = p(\beta)p(X|\beta) \prod_{k=1}^K p(\theta_k) \prod_{n=1}^N p(y_n|x_n, \{\theta_k\}_{k=1}^K) \quad (1)$$

290 The term  $p(X|\beta)$  describes the MRF component of the joint distribution. The MRF distribution is  
291 a product of terms for each edge in the graph. Each term in the product is the exponential of the

292 entry in the matrix  $\beta$  corresponding to the identity of contributing edges. The unnormalized form  
 293 of  $p(X|\beta)$  is given in equation 2.

$$\begin{aligned} p(X|\beta) &\propto \prod_{\{n,n'\} \in E} \exp(\beta_{x_n x_{n'}}) \\ &= \exp\left(\sum_{\{n,n'\} \in E} \beta_{x_n x_{n'}}\right) \end{aligned} \quad (2)$$

294 The normalization constant  $Z(\beta)$  of  $p(X|\beta)$  can be found by summing over all possible values of  
 295  $X = \{x_i\}_{i=1}^N$ , which is intractable for all but small values of  $N$ . As we discuss later this poses an  
 296 inferential challenge when updating  $\beta$ .

297 Thus the full hierarchical model, except for the specification of  $\beta$ , is as follows.

$$\begin{aligned} \theta_{km} = (\mu_{km}, \tau_{km}) &\sim \text{NormalGamma}(\cdot | \mu_0, \lambda_0, \alpha_0, \beta_0, ) \\ X|\beta &\sim \text{MRF}(\cdot | \beta) \\ y_{nm} | x_{nm} = k, \{\theta_\ell\}_{\ell=1}^K &\sim \text{Normal}(\cdot | \mu_{km}, \tau_{km}) \end{aligned}$$

298 The model can be trivially extended to multiple samples or regions of interest by treating each new  
 299 sample as separate connected components of the MRF graph.

### 300 **Specifying the affinity matrix**

301 The affinity matrix  $\beta$  is assumed to be symmetric, thus there are up to  $\frac{K(K+1)}{2} \in \mathcal{O}(K^2)$  free  
 302 parameters that need to be specified. In practice, it is neither computationally feasible nor statistically  
 303 efficient to treat all entries of  $\beta$  as free parameters. Here we discuss several parameterizations of  $\beta$   
 304 which lead to different variants of the SpatialSort model.

305 The simplest and most commonly employed parameterizations of  $\beta$  is to use a single value,  $\beta^s$ ,  
 306 which is shared across all diagonal entries and setting the off diagonals to 0 i.e.  $\beta_{kk} = \beta^s$  and  
 307  $\beta_{kl} = 0$  for  $k \neq l$ . This simple model, often referred to as the Potts model, captures affinities of

308 cells of the same type and assumes that they all have the same strength. Due to the intractability  
309 of the normalization constant  $Z(\beta)$  of  $p(X|\beta)$ , it is common to fix  $\beta^s$ . We refer to the variants of  
310 SpatialSort with  $\beta^s$  fixed as the 0p and with  $\beta^s$  estimated as the 1p model. For the 1p model we  
311 assign  $\beta^s$  a Uniform(0, 1) prior. For the 0p model we fix  $\beta^s$  to 0.5 for all analyses performed in  
312 this work.

313 The limitation of the standard Potts model, is the inability to capture affinities between clusters  
314 (cell populations) of different types. To address this we consider a richer parameterization of  $\beta$   
315 which allows for variable strengths of autonomous interactions, and allows for non-autonomous  
316 interactions. We refer to this model as the  $Kp$  model, as there are  $K$  parameters which need to be  
317 estimated. In the  $Kp$  model the diagonals of  $\beta$  are set to  $\beta_{kk} = \beta_k^s$  which accounts for variable  
318 affinities for autonomous interactions. We define  $\beta_k^d = 1 - \beta_k^s$  and let  $\beta_{kl} = \frac{\beta_k^d + \beta_l^d}{2}$  for the off  
319 diagonal terms to capture non-autonomous interactions. We assign a Uniform(0, 1) prior to  $\beta_k^s$ .

## 320 **Incorporating prior knowledge into clustering**

321 The incorporation of prior knowledge of the marker proteins can be applied to improve clustering  
322 accuracy. A quaternary coded  $K$  by  $M$  prior expression matrix can serve as an input parameter  
323 of SpatialSort, where each row is a prior belief of the marker intensities for a cluster. Through  
324 coding values from 0 to 2, the mean parameter  $\mu_{km}$  of  $\theta_{km}$  is then translated to the 25th, 50th, and  
325 75th percentiles for each marker expression of  $Y$ . The value -1 is a special case which translates  
326 to a zero mean coupled with an high variance, which occurs in the case when we do not have prior  
327 knowledge on the expression of markers.

328 Another approach is to leverage previously annotated cell types and anchor clusters to specific  
329 expression profiles. The introduced cells are referred to as anchors, as they are observed variables  
330 influencing the updates of cell cluster assignments and strongly anchor clusters to a specific  
331 expression signature profile. Anchors have a fixed cluster assignment and do not contribute  
332 to the HMRF graph. The anchors act to specify the distribution parameters of their associated  
333 clusters. This approach improves the accuracy of clustering and allows for label transfer between



334 disaggregate and spatial datasets.

### 335 **Inference of latent cluster labels and cell-cell interactions**

336 Inference on  $X$  and  $\beta$  constitutes of computing the (marginalized) posterior distribution, which  
337 can be formulated as:

$$P(X, \beta | Y) \propto P(Y | \beta, X) P(X | \beta) P(\beta)$$

338 Closed-form solutions are intractable due to the complexity of the model, instead we employ  
339 Markov Chain Monte Carlo sampling methods to approximate the posterior distribution. Cell  
340 labels  $x_n$  are sampled through a collapsed Gibbs sampler (CGS). The interaction parameters  $\beta$   
341 are sampled via a Double Metropolis-Hastings (DMH) sampler<sup>25</sup>. Detailed information about the  
342 CGS and DMH steps are described in the **Supplementary Note**. One full iteration of the inference  
343 algorithm perform five updates of  $\beta$  using the DMH algorithm and one update of  $X$  using Gibbs  
344 sampling.

### 345 **Obtaining point estimates of the MCMC trace**

346 Given the approximated posterior distribution of  $X$  and  $\beta$  through sampling, referred to as the  
347 MCMC trace, we summarize the posterior by deriving point estimates for downstream analysis.

348 To derive a point estimate for  $X$ , we construct a distance matrix using Hamming distance and  
349 apply hierarchical clustering. For all experiments on synthetic and real datasets, we ran SpatialSort  
350 for 500 iterations. A burn-in portion of half the MCMC trace is removed as standard practice.

351 For unsupervised clustering, we optimize the Maximization of Posterior Expected Adjusted Rand  
352 (MPEAR)<sup>26</sup> criterion which yields a sequence of consensus class labels given the MCMC trace.

353 In anchor mode, we do not optimize MPEAR, instead we use the last sample given the trace has  
354 reached convergence.

## 355 **Preprocessing**

356 For the semi-real dataset experiments, a 13-dimensional CyTOF dataset of bone marrow  
357 mononuclear cells were downloaded from Levine *et al.* Cells without labels from gating were  
358 discarded. An arcsin transformation was applied to normalize the dataset. Dimensional reduction  
359 with PCA was performed on the markers for unsupervised clustering, anchor mode, and GMM.  
360 For the real-world DLBCL dataset experiments, CyTOF DLBCL datasets were normalized by  
361 marker against a spike-in control to account for machine drift and batch effects in staining. This  
362 dataset was then normalized by a hyperbolic arcsin function. MIBI DLBCL datasets were also  
363 normalized by a hyperbolic arcsin function and divided by 10 to reduce expression intensity to  
364 the same scale as CyTOF. As there were no common B cell lineage marker between CyTOF  
365 and MIBI, CD19 and PAX5 were treated as equivalent. In the anchor experiments, spatially  
366 aware downsampling through breadth first search was performed on the MIBI data to 2000 cells  
367 per sample. Addition subsetting was done on both CyTOF and MIBI datasets to retain only  
368 overlapping markers: CD45, CD19/PAX5, CD3, CD4, CD8, CD45RO, CD57, CXCR5, PD-1.  
369 Dimensional reduction with PCA was performed on the common cell type lineage markers between  
370 the two modalities. The top six principal components were used as input for label transferring.

## 371 **Benchmarking**

372 For all forward simulations, Gaussian mixture simulations and semi-real simulations, we applied  
373 GMM as a benchmarking method using the GaussianMixture function from the scikit-learn  
374 package version 0.24.2<sup>27</sup>. The number of components for GMM were set to the same number  
375 of clusters as were set for SpatialSort. For the latter two simulations, we additionally applied  
376 Phenograph version 1.5.7<sup>10</sup> with default parameters for benchmarking. Clustering accuracy  
377 was assessed using the V-Measure metric which is a harmonic mean between completeness and  
378 homogeneity<sup>17</sup>.

## 379 **Declaration**

### 380 **Ethics approval and consent to participate**

381 All samples were obtained with informed consent and according to protocols approved by the  
382 BCCA Research Ethics Board.

### 383 **Consent for publication**

384 All patients provided written consent for publication.

### 385 **Availability of data and materials**

386 The SpatialSort Python package is available on Github at: [https://github.com/](https://github.com/Roth-Lab/SpatialSort)  
387 `Roth-Lab/SpatialSort` under the MIT license. Raw data for all the experiments used in this  
388 article have been deposited in Zenodo with DOI: [https://doi.org/10.5281/zenodo.](https://doi.org/10.5281/zenodo.6909419)  
389 `6909419`.

### 390 **Competing interests**

391 CH and AG are employees of Bristol Myers Squibb. The other authors declare that they have no  
392 competing interests.

### 393 **Funding**

394 EL was funded by a graduate fellowship from the Canadian Institutes of Health Research. AR is a  
395 Michael Smith Health Research BC scholar. We acknowledge generous funding support provided  
396 to AR by the BC Cancer Foundation. In addition, AR receives operating funds from the Natural  
397 Sciences and Engineering Research Council of Canada (grant RGPIN-2022-04378), Terry Fox  
398 Research Institute (grant 1061) and the V Foundation (grant V2021-033). The DLBCL work was  
399 also supported by an operating grant from the Canadian Institutes of Health Research (CIHR) to

400 AW and in-kind contribution of MIBI data from Bristol-Meyers Squibb. This work was supported  
401 by Cancer Research UK grant C31893/A25050 (AR).

## 402 **Authors' Contributions**

403 AR and AW conceived the study design. EL, KC, ABC, and AR designed the statistical method.  
404 EL, MN, XW, CH, AG carried out the experiments. EL, KC implemented the software. EL, MN,  
405 XW performed the data processing, analysis, and simulations. All authors read and approved the  
406 final manuscript.

## 407 **Acknowledgements**

408 We provide a detailed listing of the members of the IMAXT Consortium: Mohammad Al Sa'd,  
409 Hamid Raza Ali, Martina Alini, Samuel Aparicio, Heather Ashmore, Thomas Ashmore, Shankar  
410 Balasubramanian, Giorgia Battistoni, Robby Becker, Bernd Bodenmiller, Edward S Boyden,  
411 Dario Bressan, Alejandra Bruna, Marcel Burger, Carlos Caldas, Maurizio Callari, Ian Gordon  
412 Cannell, Nick Chornay, Ali Dariush, Lauren Deighton, Lauren Deighton, Khanh N Dinh, Yaniv  
413 Eyal-Lubling, Jean Fan, Atefeh Fatemi, Debarati Ghosh, Eduardo A González-Solares, Wendy  
414 Greenwood, Flaminia Grimaldi, Gregory J Hannon, Owen Harris, Suvi Harris, Cristina Jauset,  
415 Johanna A Joyce, Tatjana Kovačević, Laura Kuett, Russell Kunes, Daniel Lai, Emma Laks, Hsuan  
416 Lee, Giulia Lerda, Yangguang Li, Jack Lovell, Yangning Lu, John Marioni, Andrew McPherson,  
417 Neil Millar, Alireza Molaeinezhad, Claire M Mulvey, João CF Nogueira, Fiona Nugent, Ciara  
418 H O'Flanagan, Marta Paez Ribes, Isabella Pearsall, Sarah Pearsall, Brett Pryor, Fatime Qosaj,  
419 Clare Rebbeck, Andrew Roth, Oscar M Rueda, Teresa Ruiz, Kirsty Sawicka, Leonardo A  
420 Sepúlveda, Sohrab P Shah, Abigail Shea, Anubhav Sinha, Austin Smith, Simon Tavaré, Ignacio  
421 Vázquez-García, Sara Lisa Vogl, Nicholas A Walton, Spencer S Watson, Joanna Weselak, Tristan  
422 Whitmarsh, Jonas Windhager, Ruihan Zhang, Chi Zhang, Pu Zheng & Xiaowei Zhuang.

## 423 **References**

- 424 1. Giesen C, Wang HAO, Schapiro D, Zivanovic N, Jacobs A, Hattendorf B, et al. Highly  
425 multiplexed imaging of tumor tissues with subcellular resolution by mass cytometry. *Nature*  
426 *Methods*. 2014;11(4):417-22.
- 427 2. Angelo M, Bendall SC, Finck R, Hale MB, Hitzman C, Borowsky AD, et al. Multiplexed ion  
428 beam imaging of human breast tumors. *Nature Medicine*. 2014;20:436-42.
- 429 3. Goltsev Y, Samusik N, Kennedy-Darling J, Bhate S, Hale M, Vazquez G, et al. Deep Profiling  
430 of Mouse Splenic Architecture with CODEX Multiplexed Imaging. *Cell*. 2018;174(4):968-81.
- 431 4. Azizi E, Carr AJ, Plitas G, Cornish AE, Konopacki C, Prabhakaran S, et al. Single-Cell  
432 Map of Diverse Immune Phenotypes in the Breast Tumor Microenvironment. *Cell*.  
433 2018;174(5):1293-308.
- 434 5. Keren L, Bosse M, Marquez D, Angoshtari R, Jain S, Varma S, et al. A Structured  
435 Tumor-Immune Microenvironment in Triple Negative Breast Cancer Revealed by Multiplexed  
436 Ion Beam Imaging. *Cell*. 2018 September;174(6):1373-87.e19.
- 437 6. Schürch CM, Bhate SS, Barlow GL, Phillips DJ, Noti L, Zlobec I, et al. Coordinated Cellular  
438 Neighborhoods Orchestrate Antitumoral Immunity at the Colorectal Cancer Invasive Front.  
439 *Cell*. 2020 October;183(3):838.
- 440 7. Jackson HW, Fischer JR, Zanutelli VRT, Ali HR, Mechera R, Soysal SD, et al. The single-cell  
441 pathology landscape of breast cancer. *Nature*. 2020;578(1):615-20.
- 442 8. Ali HR, Jackson HW, Zanutelli VRT, Danenberg E, Fischer JR, Bardwell H, et al. Imaging  
443 mass cytometry and multiplatform genomics define the phenogenomic landscape of breast  
444 cancer. *Nature Cancer*. 2020;1(1):163-75.
- 445 9. Rendeiro AF, Ravichandran H, Bram Y, Chandar V, Kim J, Meydan C, et al. The

- 446 spatial landscape of lung pathology during COVID-19 progression. *Nature*. 2021  
447 May;593(7860):564-9.
- 448 10. Levine JH, Simonds EF, Bendall SC, Davis KL, ad D Amir E, Tadmor MD, et al. Data-Driven  
449 Phenotypic Dissection of AML Reveals Progenitor-like Cells that Correlate with Prognosis.  
450 *Cell*. 2015;162(1):184-97.
- 451 11. Zhu Q, Shah S, Dries R, Cai L, Yuan GC. Identification of spatially associated subpopulations  
452 by combining scRNAseq and sequential fluorescence in situ hybridization data. *Nature*  
453 *Biotechnology*. 2018 October.
- 454 12. Yang Y, Shi X, Liu W, Zhou Q, Lau MC, Lim JCT, et al. SC-MEB: spatial clustering with  
455 hidden Markov random field using empirical Bayes. *Briefings in Bioinformatics*. 2021;23(1).
- 456 13. Kindermann R. Markov random fields and their applications. American Mathematical Society.  
457 1980.
- 458 14. Bishop CM. Pattern Recognition and Machine Learning. Berlin, Heidelberg: Springer-Verlag;  
459 2006.
- 460 15. Zhang AW, O’Flanagan C, Chavez EA, Lim JL, Ceglia N, McPherson A, et al. Probabilistic  
461 cell-type assignment of single-cell RNA-seq for tumor microenvironment profiling. *Nature*  
462 *Methods*. 2019;16(10):1007-15.
- 463 16. Pasquini G, Rojo Arias JE, Schäfer P, Busskamp V. Automated methods for cell type  
464 annotation on scRNA-seq data. *Computational and Structural Biotechnology Journal*.  
465 2021;19:961-9.
- 466 17. Rosenberg A, Hirschberg J. V-Measure: A conditional entropy-based external  
467 cluster evaluation measure. *Proceedings of the 2007 Joint Conference on Empirical*  
468 *Methods in Natural Language Processing and Computational Natural Language Learning*.  
469 2007;12:410-20.

- 470 18. Demšar J. Statistical comparisons of classifiers over multiple data sets. *The Journal of Machine*  
471 *Learning Research*. 2006;7:1-30.
- 472 19. Melnykov V, Chen WC, Maitra R. *MixSim: An R Package for Simulating Data to Study*  
473 *Performance of Clustering Algorithms*. *Journal of Statistical Software*. 2012;51:12.
- 474 20. Bendall SC, Simonds EF, Qiu P, ad D Amir E, Krutzik PO, Finck R, et al. Single-cell  
475 mass cytometry of differential immune and drug responses across a human hematopoietic  
476 continuum. *Science*. 2011;332(6030):687-96.
- 477 21. Scott DW, Gascoyne RD. The tumour microenvironment in B cell lymphomas. *Nature*  
478 *Reviews Cancer*. 2014;14(1):517-34.
- 479 22. Davies DL, Bouldin DW. A Cluster Separation Measure. *IEEE Transactions on Pattern*  
480 *Analysis and Machine Intelligence*. 1979;PAMI-1(2):224-7.
- 481 23. Law CW, Chen Y, Shi W, Smyth GK. voom: Precision weights unlock linear model analysis  
482 tools for RNA-seq read counts. *Genome Biology*. 2014;15(2):1-17.
- 483 24. Love MI, Huber W, Anders S. Moderated estimation of fold change and dispersion for  
484 RNA-seq data with DESeq2. *Genome Biology*. 2014;15(12):1-21.
- 485 25. Liang F. A double Metropolis-Hastings sampler for spatial models with intractable  
486 normalizing constants. *Journal of Statistical Computation and Simulation*.  
487 2009;80(9):1007-22.
- 488 26. Fritsch A, Ickstadt K. Improved Criteria for Clustering Based on the Posterior Similarity  
489 Matrix. *Bayesian Analysis*. 2009;4(2):367-92.
- 490 27. Pedregosa F, Varoquaux G, Gramfort A, Michel V, Thirion B, Grisel O, et al. Scikit-learn:  
491 Machine Learning in Python. *Journal of Machine Learning Research*. 2011;12:2825-30.

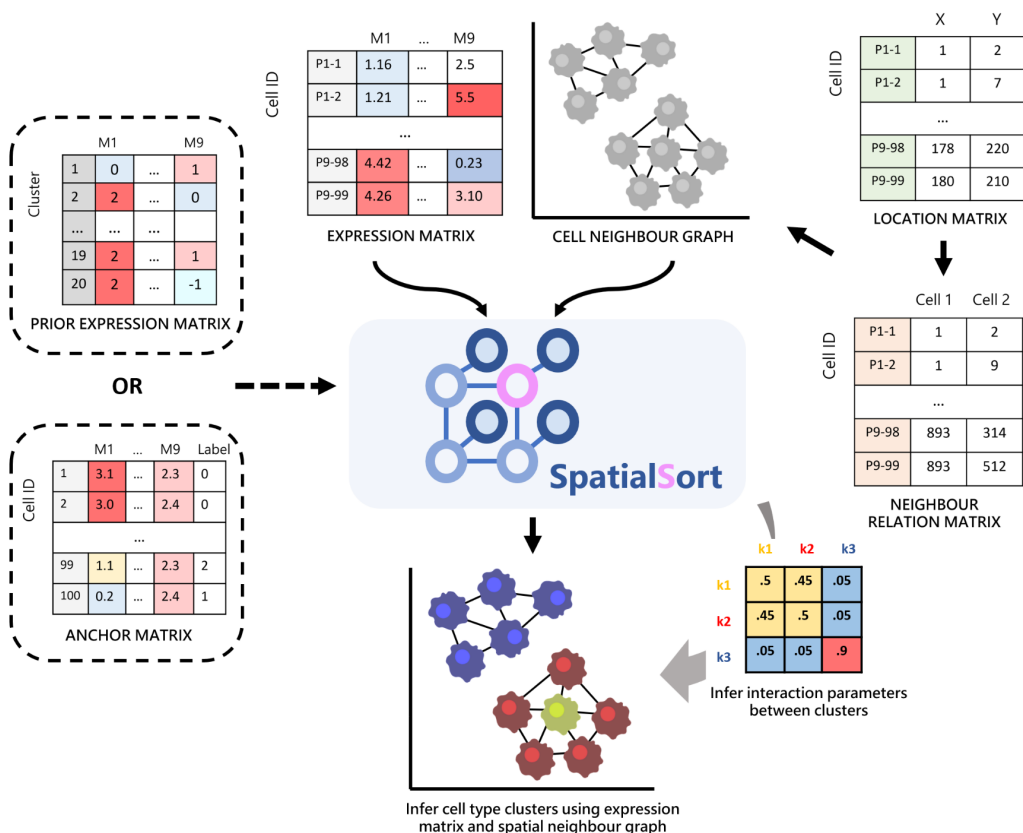

Figure 1: Schematic overview of SpatialSort. SpatialSort requires expression, cell location, and neighbour relation data as inputs. For each patient, a neighbour graph modeled by a MRF is built to represent the spatial context. Using both expression data and spatial structure for inference, SpatialSort jointly infers cluster assignment and the interaction parameter of the HMRF to probabilistically assign each cell to a given cell type cluster in an unsupervised setting. When an expectation of certain cell types or a collection of labeled data is present, a prior expression matrix or an anchor expression matrix can be incorporated to improve clustering or perform label transfer.



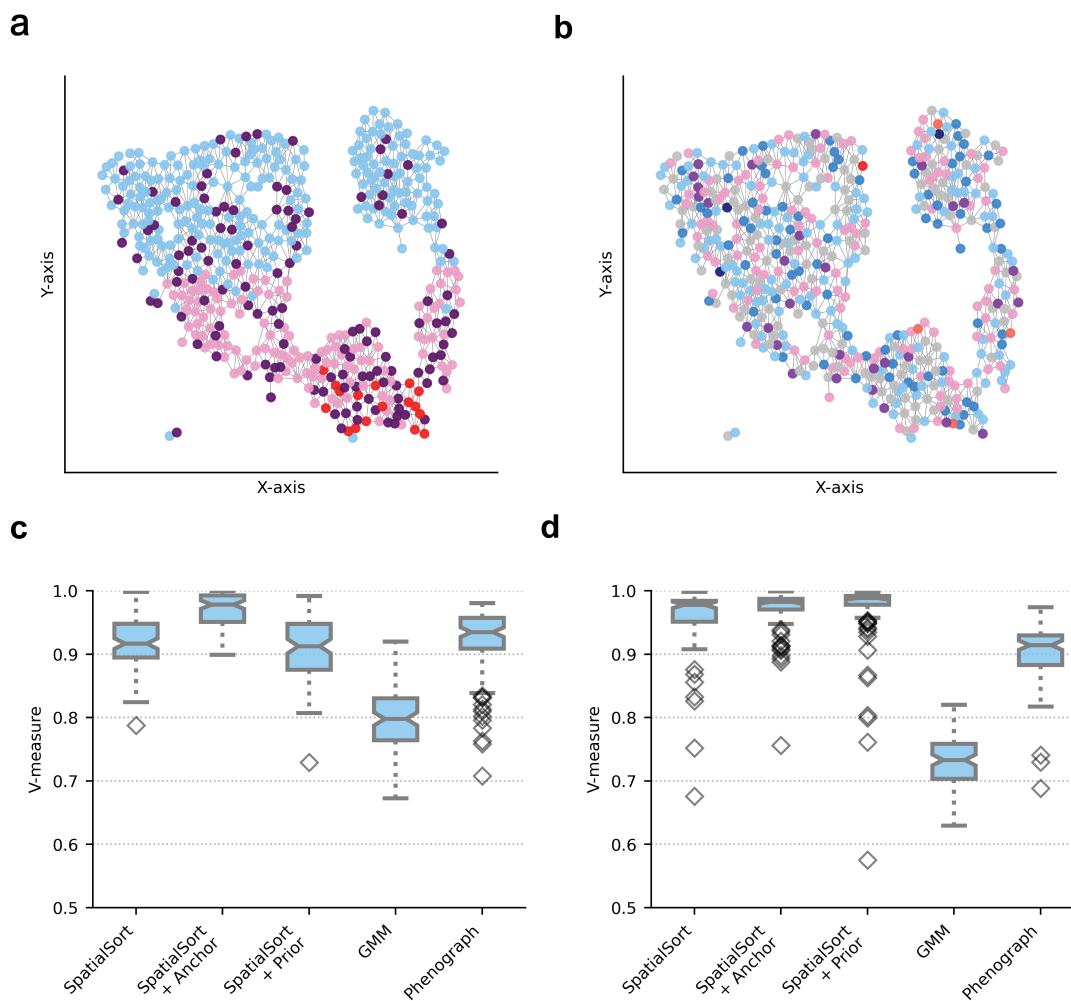

Figure 2: Performance on semi-real spatial CyTOF data. **a)** An example of a spatial neighbour graph of a singular sample in the biased dataset. Nodes indicate a single cell color-coded by cluster assignment. Cells tend to engage in autonomous interactions spatially. **b)** An example of a spatial neighbour graph of a single sample in the uniform dataset as a comparison. Uniform interaction terms render cells to have a random chance of neighbouring any type of cell. **c)** Boxplot of V-measure scores to show clustering accuracy of various methods fitting on 100 semi-real biased datasets and **d)** uniform datasets.

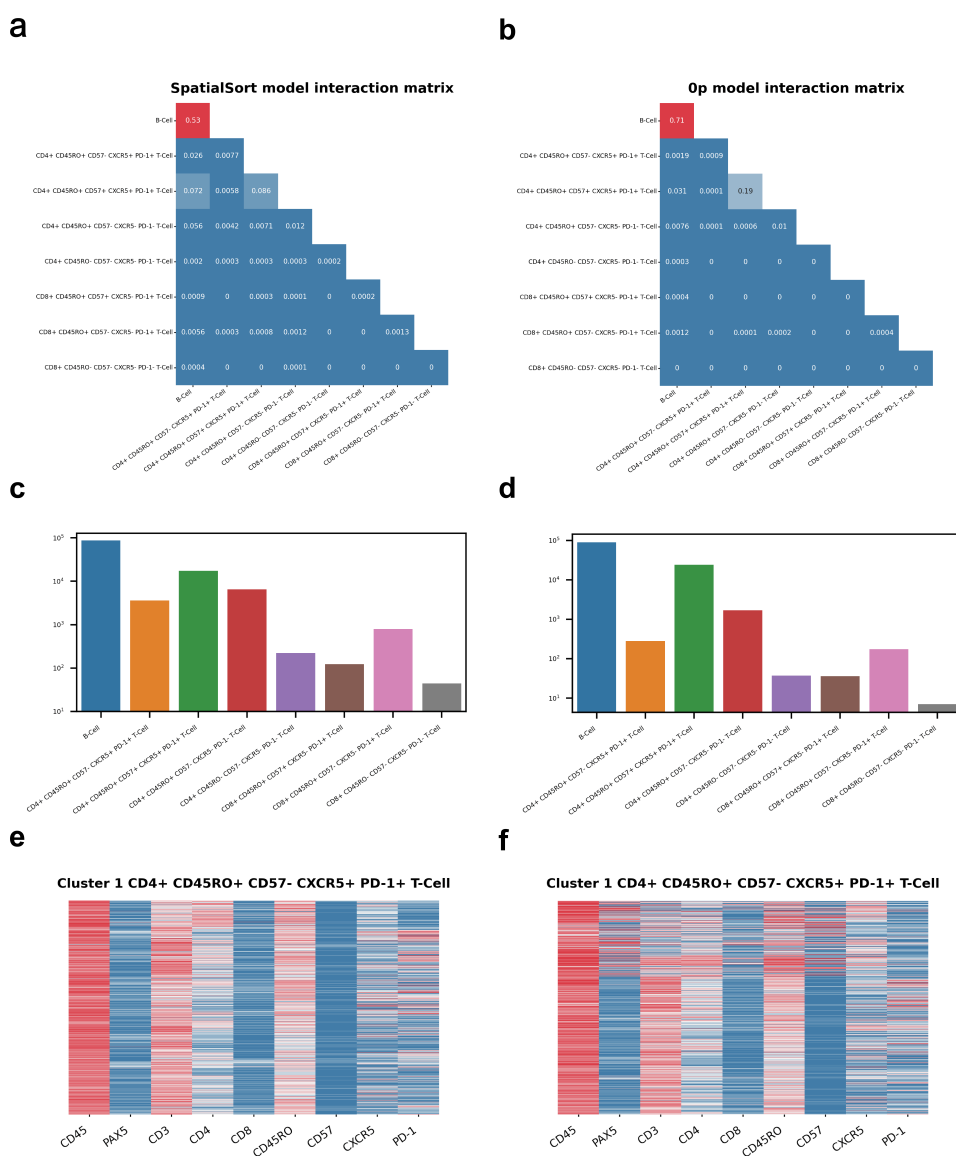

Figure 3: Cell type annotation of DLBCL MIBI data using SpatialSort allows for more effective cell-cell interaction analysis than the Op model. **a**) The interaction matrix for 29 patients with DLBCL generated using the SpatialSort model. Each cell of the matrix represents the probability distribution of an edge to be between two cell types in the HMRF. An edge represents cells of a cell type to be spatially proximal and interacting with cells of another cell type. **b**) The interaction matrix for 29 patients with DLBCL generated using the Op model. **c**) The cell type distribution bar graph of the clustering results from using the SpatialSort model. Counts are log-scaled. **d**) The cell type distribution bar graph from using the Op model. **e**) An exemplar cluster heatmap of a CD4+ CD45RO+ CD57- CXCR5+ PD-1+ T cell from using the SpatialSort model. **f**) A cluster heatmap of the same cell type from the Op model for comparison.

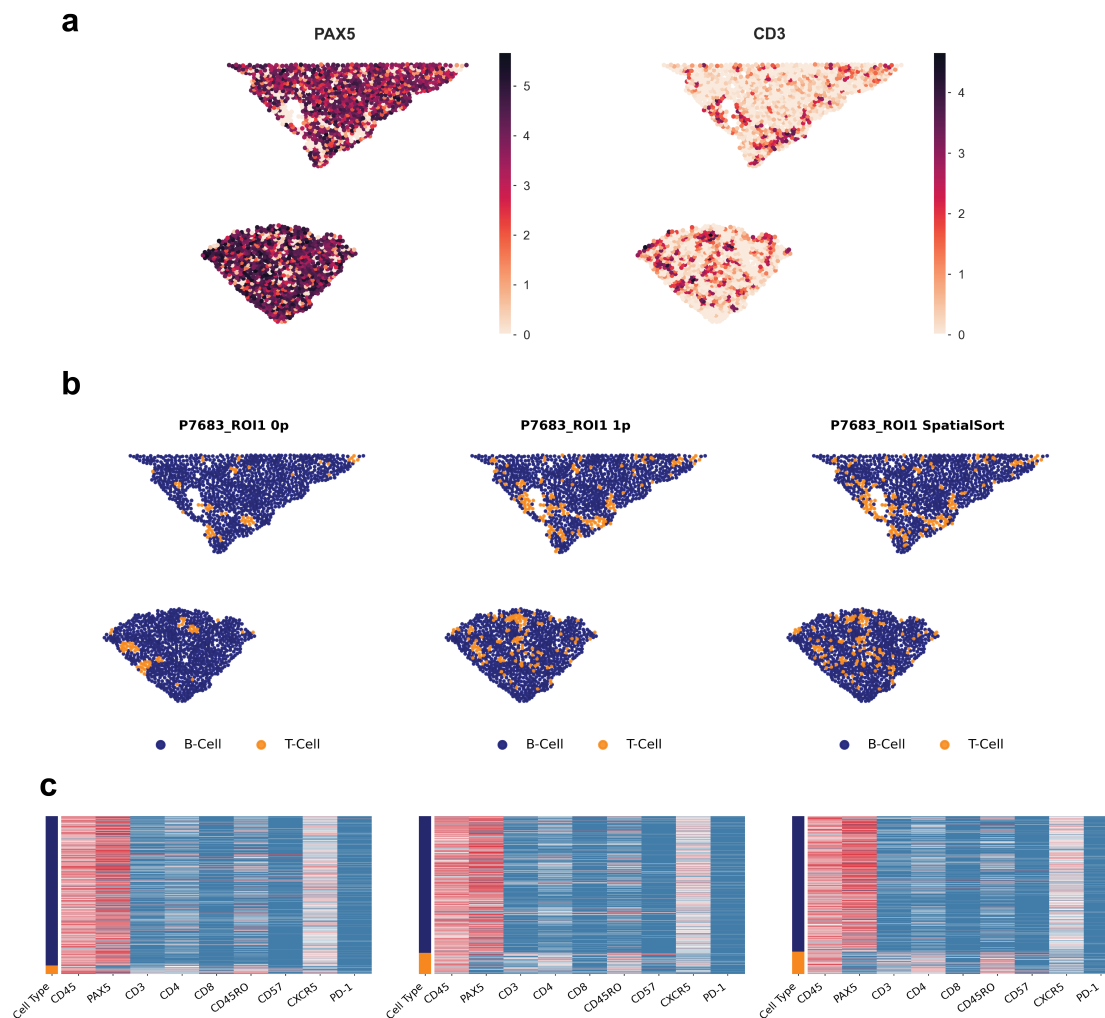

Figure 4: Cellular associations in the spatial organization of DLBCL MIBI data depicted by patient-specific neighbour graphs using SpatialSort. **a)** Spatial distribution of the expression of lymphocyte lineage markers, PAX5 and CD3, across cells in sample P7683. Color represents normalized intensity of expression. **b)** Neighbour graphs of sample P7683 plotted by spatial coordinates. Cells are color-coded by cell type assignment inferred by the 0p model, 1p model, and SpatialSort in anchor mode. **c)** Sample-specific expression heatmaps for sample P7683. Rows are color-coded by cell type in (b).
